# Supplementary material
Source: PubMed Central journal article supplement (PMC7772267)
Supplement: NIHMS1608506-supplement-1.pdf [file NIHMS1608506-supplement-1.pdf]

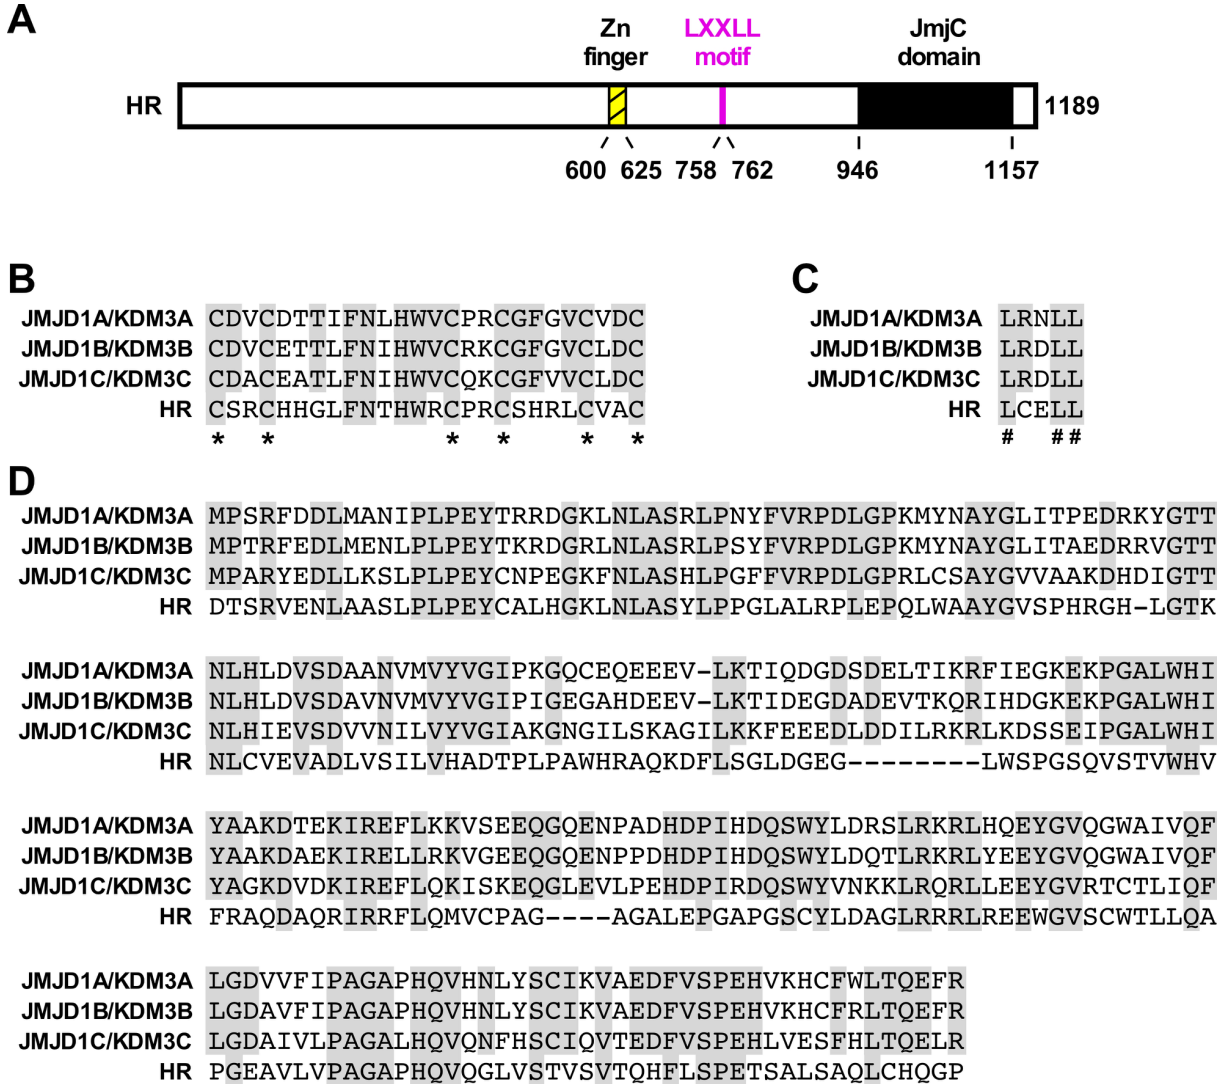

**Supplementary Figure S1.** The Hairless (HR) protein and its relationship with JMJD1 proteins. (A) Scheme of human HR; the amino acid sequence was derived from the NCBI reference sequence NP\_005135.2. (B) Alignment of the zinc fingers. Conserved cysteine residues are marked by asterisks. Identical JMJD1 amino acids are highlighted in grey and also marked so in HR if conserved. (C) Similar, alignment of the conserved LXXLL motifs. The conserved leucine residues are marked by “#”. (D) Likewise, alignment of the JmjC domains.
