# Supplementary material
Source: PubMed Central journal article supplement (PMC7772267)
Supplement: NIHMS1608506-supplement-3.pdf [file NIHMS1608506-supplement-3.pdf]

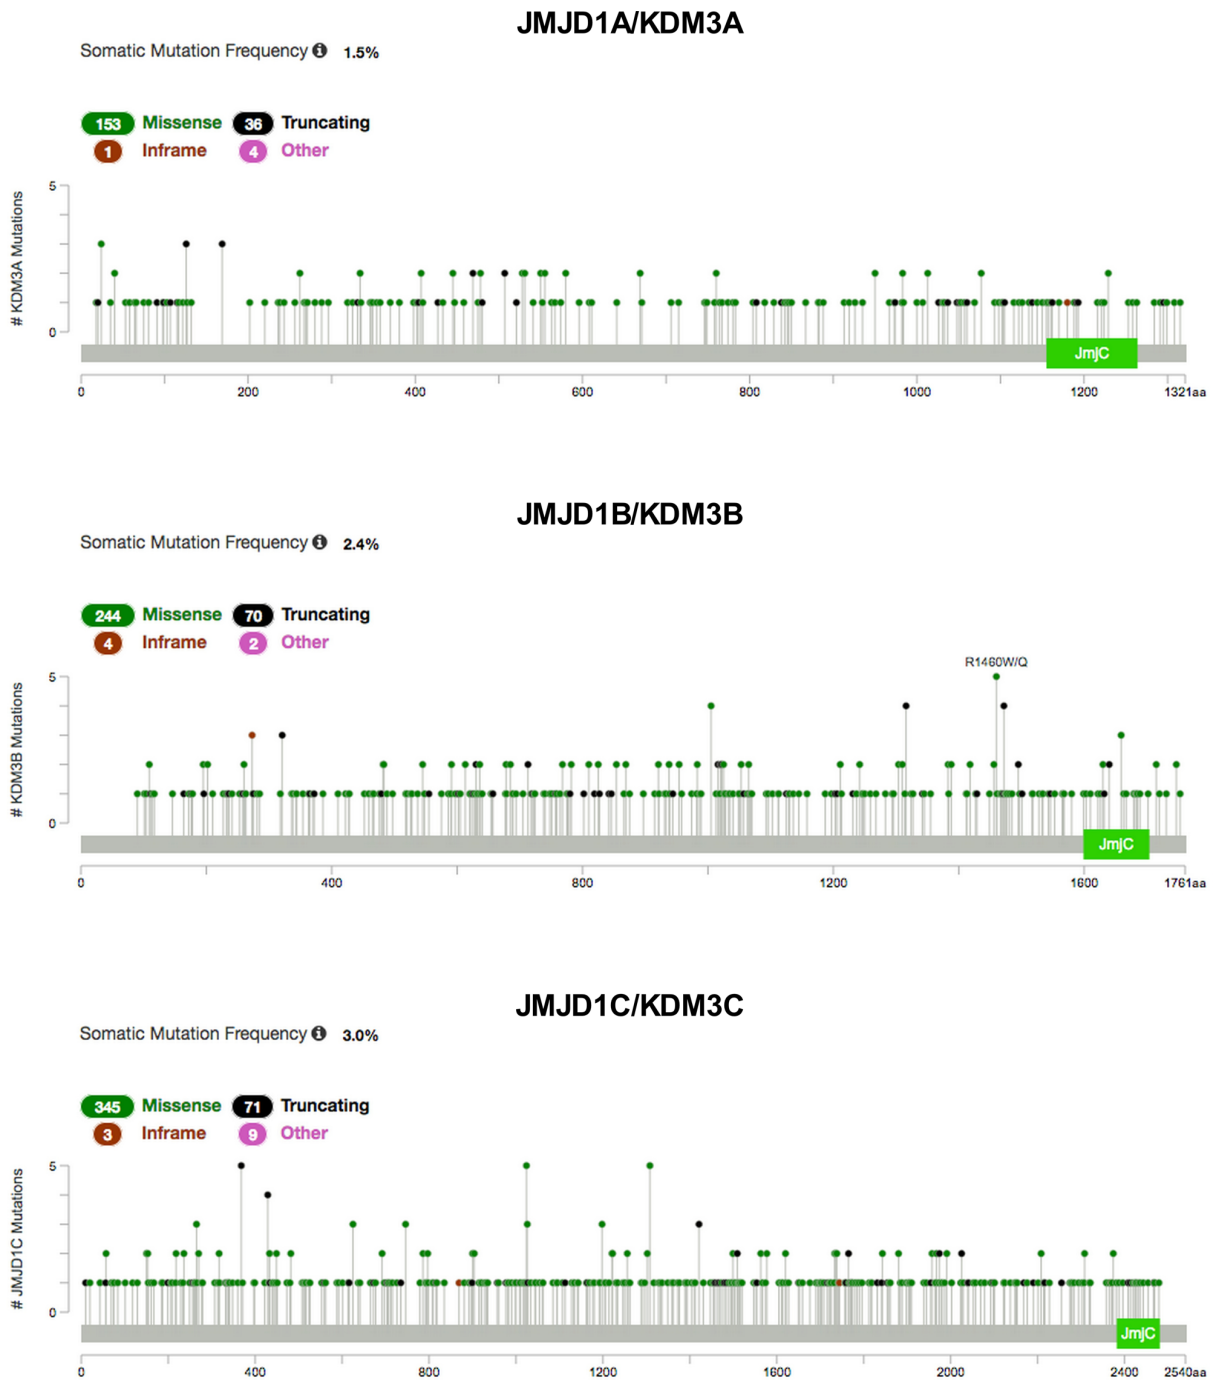

**Supplementary Figure S3.** Distribution of somatic mutations along JMJD1 amino acids. Data from 32 different tumor types in TCGA PanCancer Atlas were analyzed with cBioPortal.
