# Supplementary material
Source: PubMed Central journal article supplement (PMC7772267)
Supplement: NIHMS1608506-supplement-5.pdf [file NIHMS1608506-supplement-5.pdf]

| Tumor type                                      | Correlation between <i>JMJD1A</i> and <i>JMJD1B</i> | Correlation between <i>JMJD1A</i> and <i>JMJD1C</i> | Correlation between <i>JMJD1B</i> and <i>JMJD1C</i> |
|-------------------------------------------------|-----------------------------------------------------|-----------------------------------------------------|-----------------------------------------------------|
| Colorectal adenocarcinoma (n = 592)             | r = 0.416<br>P = 3.50e-26                           | r = 0.481<br>P = 1.59e-35                           | r = 0.441<br>P = 1.56e-29                           |
| Prostate adenocarcinoma (n = 493)               | r = 0.590<br>P = 1.30e-47                           | r = 0.652<br>P = 4.50e-61                           | r = 0.636<br>P = 3.54e-57                           |
| Breast invasive carcinoma (n = 1082)            | r = 0.348<br>P = 3.18e-32                           | r = 0.458<br>P = 2.80e-57                           | r = 0.404<br>P = 1.07e-43                           |
| Lung adenocarcinoma (n = 510)                   | r = 0.258<br>P = 3.28e-9                            | r = 0.153<br>P = 5.12e-4                            | r = 0.484<br>P = 2.24e-31                           |
| Lung squamous cell carcinoma (n = 484)          | r = 0.180<br>P = 6.95e-5                            | r = -0.117<br>P = 9.87e-3                           | r = 0.324<br>P = 2.80e-13                           |
| Pancreatic adenocarcinoma (n = 177)             | r = 0.406<br>P = 1.98e-8                            | r = 0.371<br>P = 3.83e-7                            | r = 0.478<br>P = 1.72e-11                           |
| Hepatocellular carcinoma (n = 366)              | r = 0.561<br>P = 1.08e-31                           | r = 0.518<br>P = 1.44e-26                           | r = 0.590<br>P = 1.14e-35                           |
| Stomach adenocarcinoma (n = 412)                | r = 0.405<br>P = 1.16e-17                           | r = 0.454<br>P = 2.70e-22                           | r = 0.375<br>P = 3.12e-15                           |
| Renal clear cell carcinoma (n = 510)            | r = 0.319<br>P = 1.50e-13                           | r = 0.456<br>P = 1.44e-27                           | r = 0.580<br>P = 3.32e-47                           |
| Renal papillary cell carcinoma (n = 283)        | r = 0.401<br>P = 2.23e-12                           | r = 0.575<br>P = 2.42e-26                           | r = 0.616<br>P = 5.83e-31                           |
| Cutaneous melanoma (n = 441)                    | r = 0.331<br>P = 8.94e-13                           | r = 0.379<br>P = 1.30e-16                           | r = 0.184<br>P = 1.02e-4                            |
| Ovarian serous cystadenocarcinoma (n = 300)     | r = 0.256<br>P = 7.30e-6                            | r = 0.296<br>P = 1.77e-7                            | r = 0.325<br>P = 8.52e-9                            |
| Uterine corpus endometrial carcinoma (n = 527)  | r = 0.428<br>P = 6.60e-25                           | r = 0.431<br>P = 2.96e-25                           | r = 0.590<br>P = 1.22e-50                           |
| Uterine carcinosarcoma (n = 57)                 | r = 0.446<br>P = 5.08e-4                            | r = 0.416<br>P = 1.28e-3                            | r = 0.451<br>P = 4.37e-4                            |
| Cervical squamous cell carcinoma (n = 294)      | r = 0.316<br>P = 2.98e-8                            | r = 0.211<br>P = 2.72e-4                            | r = 0.449<br>P = 5.24e-16                           |
| Thyroid carcinoma (n = 497)                     | r = 0.599<br>P = 7.07e-50                           | r = 0.629<br>P = 3.45e-56                           | r = 0.695<br>P = 6.14e-73                           |
| Lower grade glioma (n = 514)                    | r = 0.519<br>P = 8.07e-37                           | r = 0.361<br>P = 2.82e-17                           | r = 0.723<br>P = 2.12e-84                           |
| Head and neck squamous cell carcinoma (n = 515) | r = 0.429<br>P = 1.88e-24                           | r = 0.208<br>P = 1.88e-6                            | r = 0.389<br>P = 4.99e-20                           |
| Esophageal adenocarcinoma (n = 181)             | r = 0.143<br>P = 0.054                              | r = 0.115<br>P = 0.123                              | r = 0.281<br>P = 1.28e-4                            |
| Adrenocortical carcinoma (n = 78)               | r = 0.043<br>P = 0.708                              | r = -0.137<br>P = 0.232                             | r = 0.215<br>P = 0.059                              |
| Acute myeloid leukemia (AML; n = 173)           | r = 0.204<br>P = 6.96e-3                            | r = 0.047<br>P = 0.535                              | r = 0.133<br>P = 0.081                              |

**Supplementary Table S1.** Correlation between *JMJD1* mRNA levels in tumors. Expression data (RSEM, batch normalized from Illumina HiSeq\_RNASeqV2) are based on TCGA PanCancer Atlas and were analyzed through cBioPortal ([www.cbioportal.org](http://www.cbioportal.org)); r, Spearman correlation. Red color marks absence of statistical significance ( $P \geq 0.05$ ), while negative correlation coefficients are highlighted in magenta.
